# Supplementary material for: Flow Physics Explains Morphological Diversity of Ciliated Organs
Source: bioRxiv or medRxiv preprint supplement (doi:10.1101/2023.02.12.528181), 2024-04-02
Supplement: Supplementary file [file media-2.pdf]

| INDEX | Phylum          | Clade         | Common Name               | Sub-Group(s)                         | Species                                               | Cilia Type: Internal motile cilia IC, External motile cilia EC, Flagellated Sperm S | Organ                                                                                                                                               | Orientation to channel axis: Perpendicular (carpet-style) 1; horizontal (flame-style) 2 | Function: unknown/eise 0, pumping/transport 1, ultrafiltration/pre-sure/valve 2 | Function                                                                                                                                                                                                                                             | References consulted                                  | H [µm] | h <sup>2</sup> /H <sup>2</sup> (where applicable) | h/H  | References consulted                                                                | Cilia length [µm]     | References consulted                                                     | Duct length [µm]                                   | References consulted                                                              | Initial Packing Density (0-1)                                                                                   | Additional comments                                                                                                                                                                  |
|-------|-----------------|---------------|---------------------------|--------------------------------------|-------------------------------------------------------|-------------------------------------------------------------------------------------|-----------------------------------------------------------------------------------------------------------------------------------------------------|-----------------------------------------------------------------------------------------|---------------------------------------------------------------------------------|------------------------------------------------------------------------------------------------------------------------------------------------------------------------------------------------------------------------------------------------------|-------------------------------------------------------|--------|---------------------------------------------------|------|-------------------------------------------------------------------------------------|-----------------------|--------------------------------------------------------------------------|----------------------------------------------------|-----------------------------------------------------------------------------------|-----------------------------------------------------------------------------------------------------------------|--------------------------------------------------------------------------------------------------------------------------------------------------------------------------------------|
| 1     | Annelida        | Trochozoa     | Ringed or Segmented Worms | Polychaete worm                      | Aeolosoma bengalensis                                 | IC                                                                                  | Proximal nephridial duct of metanephridia                                                                                                           | 2                                                                                       | 0                                                                               | Presumed pumping/valve                                                                                                                                                                                                                               | Bunke 1994                                            | 1      | 0.5                                               | 0.71 | Bunke 1994, Fig.4                                                                   | NA                    | 10                                                                       | Bartolomeaus 1998, Fig. 7E and Fig. 1E (schematic) | 0.5                                                                               | estimated from lower limit (100 of diameter) since Bunke 1994 calls the duct "long" without providing schematic |                                                                                                                                                                                      |
| 2     | Annelida        | Trochozoa     | Ringed or Segmented Worms | Polychaete worm                      | Anailides mucosa                                      | IC                                                                                  | Ciliated funnel parallel to pronephridial duct in adults                                                                                            | 2                                                                                       | 0                                                                               | Potential uptake of gametes from coelum                                                                                                                                                                                                              | Bartolomeaus 1998                                     | 20     | 0.84                                              | 0.92 | Bartolomeaus 1998, Fig.6B                                                           | 15                    | Bartolomeaus 1998, Table 4                                               | 40                                                 | Bartolomeaus 1998, Fig. 7E and Fig. 1E (schematic)                                | 0.84                                                                                                            |                                                                                                                                                                                      |
| 3     | Annelida        | Trochozoa     | Ringed or Segmented Worms | Polychaete worm                      |                                                       | IC                                                                                  | Duct of pronephridia in adults                                                                                                                      | 2                                                                                       | 2                                                                               | Excretion/ Ultrafiltration                                                                                                                                                                                                                           | Bartolomeaus 1998                                     | 2      | 0.8                                               | 0.89 | Bartolomeaus 1998, Fig.4G                                                           | 20                    | Bartolomeaus 1998, Table 4                                               | 40                                                 | Bartolomeaus 1998, Fig. 1E (schematic)                                            | 0.8                                                                                                             |                                                                                                                                                                                      |
| 4     | Annelida        | Trochozoa     | Ringed or Segmented Worms | Polychaete worm                      | Nemilidium rogluchaeroides                            | IC                                                                                  | Foregut                                                                                                                                             | 1                                                                                       | 1                                                                               | Transport of food particles and mucus                                                                                                                                                                                                                | Purschke & Tzvetlin 1992                              | 20     | 0.2                                               | 0.45 | Purschke & Tzvetlin 1992, Fig. 4A                                                   | 10                    | Purschke & Tzvetlin 1992, Fig. 4A & text                                 | 150                                                | Purschke & Tzvetlin 1992, text                                                    | 0.5                                                                                                             |                                                                                                                                                                                      |
| 5     | Annelida        | Trochozoa     | Ringed or Segmented Worms | Spoon Worm                           | Thalassema thalassumum                                | IC                                                                                  | Terminal cell of larvae ("head kidney")                                                                                                             | 2                                                                                       | 2                                                                               | Excretion/ Ultrafiltration/absorption                                                                                                                                                                                                                | Kato 2011                                             | 1.5    | 0.78                                              | 0.88 | Kato 2011, Fig. 3C;text                                                             | 15                    | Kato 2011, Fig. 3C, text                                                 | 15                                                 | Kato 2011, Fig. 3C, text                                                          | 0.78                                                                                                            |                                                                                                                                                                                      |
| 6     | Brachiopoda     | Trochozoa     | Lampshells                |                                      | Lingula anatina                                       | IC                                                                                  | Ciliated internal epithelium of the mantle                                                                                                          | 1                                                                                       | 1                                                                               | Transport of particles and mucus                                                                                                                                                                                                                     | 1968, Westbroek 1980                                  | 5.0    | 0.05                                              | 0.05 | 1968, Westbroek 1980, Plate IA; Forchiel 2012                                       | 13                    | Westbroek 1980 Txt, Plate 1, Fig.6E                                      | 1000                                               | estimated from Gerold 2018                                                        | 0.5                                                                                                             |                                                                                                                                                                                      |
| 7     | Bryozoa         | Spiralia      |                           |                                      | Phylactolaemata                                       | IC                                                                                  | Ciliated trunk coelom                                                                                                                               | 1                                                                                       | 0                                                                               | Presumably nutrient transport (since lack of blood vessels)                                                                                                                                                                                          | Gruhl 2009                                            | 10     | 0.05                                              | 0.22 | Gruhl 2009, Fig. 4F                                                                 | 3                     | Gruhl 2009, Fig. 3B                                                      | 200                                                | estimated entire length of animal, see Gruhl 2009, Fig. 1A                        | 0.5                                                                                                             |                                                                                                                                                                                      |
| 8     | Bryozoa         | Spiralia      |                           |                                      | Phylactolaemata                                       | IC                                                                                  | Forked canal with a sort of flame cell                                                                                                              | 2                                                                                       | 0                                                                               | Has been suggested to serve for filtering since no excretory organs are known in Bryozoa                                                                                                                                                             | Gruhl 2009                                            | 5      | 0.95                                              | 0.97 | Gruhl 2009, Fig. 2B, 4C,D                                                           | 10                    | Gruhl 2009, Fig. 4C,D                                                    | 20                                                 | estimated forked channel length; Gruhl 2009 2A                                    | 0.95                                                                                                            |                                                                                                                                                                                      |
| 9     | Cephalochordata | Chordata      |                           | Lancelets                            | Branchiostoma virginiae, Branchiostoma lanceolatum    | IC                                                                                  | Hatschek's nephridium - filtration cells (cytostolocytes)                                                                                           | 2                                                                                       | 0                                                                               | Aiding ultrafiltration of the filtering has been proposed (there is ultrafiltration via diaphragms and blood pressure as well) but the cellular structure suggests otherwise - maybe pumping plus absorption (flagellum is surrounded by microvilli) | Ruppert 1996                                          | 2      | 0.34                                              | 0.58 | Ruppert 1996, Fig.7                                                                 | 10                    | Brandenburg 1961, Fig. 25                                                | 10                                                 | Brandenburg 1961, Fig. 25                                                         | 0.5                                                                                                             |                                                                                                                                                                                      |
| 10    | Cephalochordata | Chordata      |                           | Lancelets                            | Branchiostoma virginiae                               | IC                                                                                  | Intestine and colon                                                                                                                                 | 1                                                                                       | 1                                                                               | Transport of food particles and mucus                                                                                                                                                                                                                |                                                       | 200    | 0.10                                              | 0.10 | Blow 1974, Fig.3A (based on cilia length = 10µm Kucera 2009, Fig.1A)                | 10                    | Blow 1974, Fig.3A ; Kucera 2009, Fig.1A                                  | 1000                                               | estimated from He 2018                                                            | 0.5                                                                                                             |                                                                                                                                                                                      |
| 11    | Chaetognatha    | Chaetognatha  | Arrow worms               |                                      | Spadella cephaloptera                                 | IC                                                                                  | Intestine                                                                                                                                           | 1                                                                                       | 1                                                                               | Transport of particles and mucus                                                                                                                                                                                                                     | Perez 2000                                            | 15     | 0.1                                               | 0.32 | Perez 2000, Fig.5 and Perez 2001 Fig.2F                                             | NA                    |                                                                          | 3000                                               | estimated from Perez 2001 Fig. 2B                                                 | 0.5                                                                                                             |                                                                                                                                                                                      |
| 12    | Cnidaria        | Cnidaria      |                           | Octocorals                           | acrossota amboinensis                                 | IC                                                                                  | Gastrovascular cavity / stolon: Polyps are long and tubular and are interconnected by horizontal tabulae or stolons which form transverse platforms | 1                                                                                       | 1                                                                               | Transport/mixing, possibility of cells                                                                                                                                                                                                               | Harmata 2013, Fig.6                                   | 600    |                                                   | 0.03 | Harmata 2013, Fig. 7                                                                | 10                    | Harmata 2013, Fig.4E                                                     | 2000                                               | at least: estimated from Harmata 2013, Fig. 3                                     | 0.5                                                                                                             |                                                                                                                                                                                      |
| 13    | Cranialia       | Chordata      |                           | Amphibian-Caecilian                  | Geotrypetes seraphini                                 | IC                                                                                  | Neck segment of mesonephros                                                                                                                         | 2                                                                                       | 0                                                                               | Presumed: excretion/ultrafiltration                                                                                                                                                                                                                  | Meibjerg 2004, Fig. 5, 8                              | 15.00  | 0.64                                              | 0.80 | Meibjerg 2004, Fig. 8A                                                              | 20.00                 | estimated from Meibjerg 2004, Fig. 5                                     | 300                                                | Meibjerg 2004, text                                                               | 0.64                                                                                                            |                                                                                                                                                                                      |
| 14    | Cranialia       | Chordata      |                           | Mammals (human)                      | Homo sapiens sapiens                                  | IC                                                                                  | Small airways (Specifically, the epithelial pleats)                                                                                                 | 1                                                                                       | 1                                                                               | Transports mucus up the respiratory tree (Mucociliary clearance)                                                                                                                                                                                     | Bustamante-Marin 2017                                 | 50.00  |                                                   | 0.24 | Flores-Delgado 2015, Fig.1 and 2                                                    | 6.00                  | Flores-Delgado 2015, Fig. 1 and 2                                        | 1700                                               | Weibel 1963                                                                       | 0.5                                                                                                             |                                                                                                                                                                                      |
| 15    | Cranialia       | Chordata      |                           | Mammals (human)                      | Homo sapiens sapiens                                  | IC                                                                                  | Fallopian Tube                                                                                                                                      | 1                                                                                       | 1                                                                               | Transport of oocytes                                                                                                                                                                                                                                 | Raidt 2015                                            | 60.00  |                                                   | 0.20 | Raidt 2015, Fig. 4 (cilia length); Palek 1974; Varga 2018, Fig. 2 (Duct dimensions) | 6.00                  | Raidt 2015, Fig. 4                                                       | 70000                                              | 7-11cm; Han 2020                                                                  | 0.5                                                                                                             |                                                                                                                                                                                      |
| 16    | Cranialia       | Chordata      |                           | Mammals (human)                      | Homo sapiens sapiens                                  | IC                                                                                  | Tubule of bronchial submucosal gland                                                                                                                | 1                                                                                       | 1                                                                               | Transport mucus                                                                                                                                                                                                                                      | Meyrick 1969                                          | 30     |                                                   | 0.40 | Meyrick 1969, text and table (cilia length / diameter)                              | 6.00                  | Meyrick 1969                                                             | 350                                                | Meyrick 1969, text and table                                                      | 0.5                                                                                                             |                                                                                                                                                                                      |
| 17    | Cranialia       | Chordata      |                           | Mammals (human)                      | Homo sapiens sapiens                                  | IC                                                                                  | Brain ventricle cilia (ependymal cilia)                                                                                                             | 1                                                                                       | 1                                                                               | Transport / mixing                                                                                                                                                                                                                                   |                                                       | 1000   |                                                   | 0.03 | Zhuravlova 2018; Worthington 1963                                                   | 13                    | Jiménez 2014; Dempsey 1976                                               | 1000                                               | Zhuravlova 2018                                                                   | 0.3                                                                                                             |                                                                                                                                                                                      |
| 18    | Cranialia       | Chordata      |                           | Mammals (mouse)                      | Mus musculus                                          | IC                                                                                  | Brain ventricle cilia (ependymal cilia)                                                                                                             | 1                                                                                       | 1                                                                               | Transport of cerebrospinal fluid and possibly signals/cells                                                                                                                                                                                          | Faubel 2016                                           | 200.00 |                                                   | 0.10 | Xiong 2014, Fig. 1A                                                                 | 10.00                 | Xiong 2014, Fig.2B                                                       | 1000                                               | Xiong 2014, Fig.1A                                                                | 0.5                                                                                                             |                                                                                                                                                                                      |
| 19    | Cranialia       | Chordata      |                           | Mammals (mouse)                      | Mus musculus                                          | IC                                                                                  | Efferent ductules (male reproductive system)                                                                                                        | 1                                                                                       | 1                                                                               | Transport of sperm cells; stirring                                                                                                                                                                                                                   | Lee 2000; Hess 2015                                   | 100.00 |                                                   | 0.30 | average from Lambot 2009 and Yuan 2019, Movie S3, Fig.1                             | 17.00                 | Yuan 2019, Fig.4A and text                                               | 8000                                               | Lambot 2009                                                                       | 0.5                                                                                                             |                                                                                                                                                                                      |
| 20    | Cranialia       | Chordata      |                           | Amphibians (Toad)                    | Rhinella marina (Bufo marina)                         | IC                                                                                  | Kidney, peritoneal funnels (connects coelom to nephros)                                                                                             | 2                                                                                       | 2                                                                               | Blood volume/osmoregulator regulator: Filters particles and pumps protein-rich peritoneal fluid back into the kidney blood vasculature.                                                                                                              | Morris 1981                                           | 7.00   | 0.73                                              | 0.85 | Morris 1981, Fig. 11                                                                | 10.00                 | estimated from Morris 1981 Fig. 10                                       | 40                                                 | estimated from Meibjerg 2000, Fig. 5                                              | 0.85                                                                                                            |                                                                                                                                                                                      |
| 21    | Cranialia       | Chordata      |                           | Amphibians (Toad)                    | Bufo bufo / viridis                                   | IC                                                                                  | Kidney, neck segment of the mesonephros                                                                                                             | 2                                                                                       | 0                                                                               | Presumed: excretion/ultrafiltration                                                                                                                                                                                                                  | Meibjerg 1997, 2001                                   | 25.00  |                                                   | 0.76 | 0.87                                                                                | Meibjerg 1997, Fig.7C | 10.00                                                                    | Meibjerg 1997, Fig. 7C                             | 90                                                                                | Meibjerg 1998;text                                                                                              | 0.73                                                                                                                                                                                 |
| 22    | Cranialia       | Chordata      |                           | Avians - Bird (Ostrich)              | Struthio camelus                                      | IC                                                                                  | Uterus folds                                                                                                                                        | 1                                                                                       | 1                                                                               | Presumably transport of mucus                                                                                                                                                                                                                        | Sharaf 2013                                           | 30.00  |                                                   | 0.33 | Sharaf 2013, Fig.4D                                                                 | 5.00                  | Sharaf 2013, Fig. 4D                                                     | 2000                                               | at least: Sharaf 2013, Fig. 4C                                                    | 0.5                                                                                                             |                                                                                                                                                                                      |
| 23    | Cranialia       | Chordata      |                           | Reptile (Lizard)                     | Podarcis sp.                                          | IC                                                                                  | Urinary bladder Stalk                                                                                                                               | 1                                                                                       | 0                                                                               | Unknown - possibly transport of highly viscous or precipitated urine: out of bladder stalk (Bolton & Beuchat 1991)                                                                                                                                   | Bolton & Beuchat 1991                                 | 64.00  |                                                   | 0.30 | Rheubert 2014, Fig. 6.3 (duct diameter); Bolton & Beuchat 1991, Fig. 1 (cilia)      | 10.00                 | estimated from Bolton & Beuchat 1991, Fig. 1                             | 500                                                | Rheubert 2014, Fig.6.3                                                            | 0.5                                                                                                             |                                                                                                                                                                                      |
| 24    | Cranialia       | Chordata      |                           | Osteichthyes (Bony Fish) (Zebrafish) | Danio rerio (72hpf)                                   | IC                                                                                  | Pronephros proximal tubule of metanephridia                                                                                                         | 2                                                                                       | 0                                                                               | Unknown- Presumed: ultrafiltration                                                                                                                                                                                                                   | Zhang 2012, Ott 2016, Delaval 2011                    | 3      | 0.8                                               | 0.89 | Ott 2016 Fig. 3A-D; Lee 2015, Fig. 4G                                               | 9                     | Kramer-Zucker 2005 Fig.1F and Table                                      | 600                                                | Vasilyev 2012, Fig.1G and text                                                    | 0.85                                                                                                            |                                                                                                                                                                                      |
| 25    | Cranialia       | Chordata      |                           | Osteichthyes (Bony Fish) (Zebrafish) |                                                       | IC                                                                                  | Olfactory pit cilia                                                                                                                                 | 1                                                                                       | 1                                                                               | Generating flow to nose for chemical sensing                                                                                                                                                                                                         | Reiten 2017                                           | 60     |                                                   | 0.28 | Reiten 2017, Fig.1A                                                                 | 9                     | Reiten 2017, text                                                        | 60                                                 | circular; Reiten 2017, Fig. 1A                                                    | 0.5                                                                                                             |                                                                                                                                                                                      |
| 26    | Ctenophora      | Ctenophora    | Comb jellies              |                                      | Beroe abyssicola                                      | IC                                                                                  | Endodermal (gastrovascular) canal                                                                                                                   | 1                                                                                       | 1                                                                               | Absorption and transport of food                                                                                                                                                                                                                     | Presnell 2016, Norekian 2019, Tamm 2014, Gemmill 1918 | 300    |                                                   | 0.05 | Presnell 2016 Movie S4                                                              | 8                     | Cilia length ~6-10µm; Presnell 2016, Movie S4                            | 30000                                              | estimate from Presnell 2016 Fig. 1                                                | 0.5                                                                                                             |                                                                                                                                                                                      |
| 27    | Cycliophora     | Spiralia      |                           |                                      | Symbion pandora                                       | IC                                                                                  | Intestine                                                                                                                                           | 2                                                                                       | 0                                                                               | Probably absorption and transport                                                                                                                                                                                                                    | Neves 2009                                            | 2      | 0.5                                               | 0.71 | Neves 2009, Fig. 5, 4D                                                              | NA                    |                                                                          | 50                                                 | extremely crude estimate from Neves 2009 Fig.4A                                   | 0.5                                                                                                             |                                                                                                                                                                                      |
| 28    | Dicymera        | Spiralia      | Rhombozoa                 |                                      | Dicymera acuticephalum                                | IC                                                                                  | Urn Cavity in Larvae                                                                                                                                | 1                                                                                       | 0                                                                               | Unknown. Hypothesis: Pump fluid to exchange with outside? Furuya 1997                                                                                                                                                                                | Furuya 1997, 1999, Brescian 1967, Matsubara 1976      | 3      | 0.5                                               | 0.71 | Furuya 1997, Fig. 10                                                                | 2                     | estimated from Matsubara 1976 Fig.9C, text; Brescian 1967 Fig.1 & Fig. 4 | 5                                                  | estimated from drawings in Furuya 1999                                            | 0.5                                                                                                             |                                                                                                                                                                                      |
| 29    | Echinodermata   | Ambulacraria  | Echinoderms               |                                      | Hemicenturus pulcherrimus, Stongylocentrotus pallidus | IC                                                                                  | Pore canals                                                                                                                                         | 1                                                                                       | 0                                                                               | Hypothesis: In relaxed state, pumping of fluid inwards, transport of particles outwards (bi directional transport)                                                                                                                                   | Tamori 1996, Furgusson 1990, 1991, 1996               | 13.00  | 0.25                                              | 0.50 | Tamori 1996; Fig. 7a and text                                                       | 12                    | Tamori 1996, Fig. 8                                                      | 200                                                | Tamori 1996, Fig.5                                                                | 0.25                                                                                                            |                                                                                                                                                                                      |
| 30    | Echinodermata   | Ambulacraria  | Echinoderms               |                                      | Hemicenturus pulcherrimus                             | IC                                                                                  | Pore canals                                                                                                                                         | 2                                                                                       | 0                                                                               | Hypothesis: in contracted state, maintain hydrostatic pressure (for tube feet), ultrafiltration                                                                                                                                                      | Tamori 1996                                           | 8.40   | 0.65                                              | 0.81 | Tamori 1996                                                                         | 12                    | Tamori 1996, Fig. 8                                                      | 200                                                | Tamori 1996, Fig.5                                                                | 0.65                                                                                                            |                                                                                                                                                                                      |
| 31    | Entoprocta      | Spiralia      | Goblet worms              |                                      |                                                       | IC                                                                                  | Esophagus                                                                                                                                           | 1                                                                                       | 1                                                                               | Presumably transport/mixing                                                                                                                                                                                                                          | Schwaha 2010                                          | 15     |                                                   | 0.35 | Schwaha 2010, Fig.4c                                                                | 3.3                   | Schwaha 2010, Fig. 4c                                                    | 110                                                | Schwaha 2010, Fig. 4c                                                             | 0.2                                                                                                             |                                                                                                                                                                                      |
| 32    | Entoprocta      | Spiralia      | Goblet worms              |                                      | Loxosomatoides sirindhornae; Umastella gracilis       | IC                                                                                  | Terminal cells of pronephridia                                                                                                                      | 2                                                                                       | 2                                                                               | Excretion/ Ultrafiltration                                                                                                                                                                                                                           | Schwaha 2010; Kuemmel 1962                            | 2.5    | 0.75                                              | 0.87 | Schwaha 2010, Fig. 3e and f (H); Kuemmel Fig 10 (hH)                                | 20                    | Schwaha 2010, Fig. 3e and f                                              | 20                                                 | length of filtration zone (estimated from diameter/length ratio in Kuemmel Fig 8) | 0.75                                                                                                            |                                                                                                                                                                                      |
| 33    | Gastrotricha    | Spiralia      | Hairyback                 |                                      | Chaetonotus maximus                                   | IC                                                                                  | Terminal cells of pronephridia                                                                                                                      | 2                                                                                       | 2                                                                               | Excretion/ Ultrafiltration                                                                                                                                                                                                                           | Kieneke 2008; Fontaneto 2015                          | 0.5    | 0.8                                               | 0.89 | Kieneke 2008, Fig.10c; Fontaneto 2015 Fig.1.30 B                                    | 27                    | Kieneke 2008, text and Fig. 9b                                           | 27                                                 | Kieneke 2008, text and Fig. 9b                                                    | 0.8                                                                                                             | No evidence of carpet style ducts except potentially in pharynx of Dendrodoxys affinis/gadalis but no imaging data is available (Kieneke 2015)                                       |
| 34    | Gnathostomulida | Gnathifera    | Jaw worms                 |                                      | Gnathostomula paradoxa                                | IC                                                                                  | Terminal cells of pronephridia                                                                                                                      | 2                                                                                       | 2                                                                               | Blood volume/osmoregulator regulator: Filters particles and pumps protein-rich peritoneal fluid back into the kidney blood vasculature.                                                                                                              | Lammer 1985                                           | 0.6    | 0.65                                              | 0.81 | Lammer 1985, Fig. 2C                                                                | 11                    | Lammer 1985, text                                                        | 11                                                 | Lammer 1985, text                                                                 | 0.65                                                                                                            | No evidence of perpendicularly ciliated ducts in this phylum                                                                                                                         |
| 35    | Hemichordata    | Ambulacraria  | Acorn worm                |                                      | Meioglossus psammophilus                              | IC                                                                                  | Mid gut                                                                                                                                             | 1                                                                                       | 1                                                                               | Transport of food                                                                                                                                                                                                                                    | Worsaae 2012                                          | 50     |                                                   | 0.24 | Worsaae 2012, Fig. 5A; Movie S2                                                     | 6                     | Worsaae 2012, Fig. 5A; Movie S2                                          | 100                                                | Worsaae 2012, Fig. 5A                                                             | 0.5                                                                                                             | No evidence of longitudinally ciliated ducts in this phylum except potentially the ciliated canal-hypostome in the larvae but imaging data of cilia are not available (Ruppert 1998) |
| 36    | Kinorhyncha     | Scalidophora  | Mud dragons               |                                      | Pycnophyes kiellensis                                 | IC                                                                                  | Terminal cells of pronephridia                                                                                                                      | 2                                                                                       | 2                                                                               | Excretion/ Ultrafiltration                                                                                                                                                                                                                           | Neuhaus 1988                                          | 2      | 0.9                                               | 0.95 | Neuhaus 1988, Fig.4C, 5C                                                            | 20                    | Neuhaus 1988, estimated from Fig.1A                                      | 20                                                 | Neuhaus 1988, estimated from Fig.1A                                               | 0.9                                                                                                             | No evidence of perpendicularly ciliated ducts in this phylum                                                                                                                         |
| 37    | Loricifera      | Scalidophora  | Brush heads               |                                      | Armorloricus elegans                                  | IC                                                                                  | Terminal cells of pronephridia                                                                                                                      | 2                                                                                       | 2                                                                               | Excretion/ Ultrafiltration                                                                                                                                                                                                                           | Neuhaus 2007                                          | 0.2    |                                                   | 0.95 | (1 cilium) Neuhaus 2007, Fig. 4B                                                    | 9                     | Neuhaus 2007, Fig.3A and text                                            | 9                                                  | Neuhaus 2007, Fig.3A and text                                                     | 0.95                                                                                                            | No evidence of perpendicularly ciliated ducts in this phylum                                                                                                                         |
| 38    | Micrognathozoa  | Gnathifera    |                           |                                      | Limnognathia maerski                                  | IC                                                                                  | Terminal cells of pronephridia                                                                                                                      | 2                                                                                       | 2                                                                               | Excretion/ Ultrafiltration                                                                                                                                                                                                                           | Kristensen 2000                                       | 0.3    | 0.7                                               | 0.84 | Kristensen 2000, Fig.30 & 31 (average of 4 Terminal cells)                          | 6                     | Kristensen 2000, Fig.30                                                  | 6                                                  | Kristensen 2000, Fig.30                                                           | 0.7                                                                                                             | No evidence of perpendicularly ciliated ducts in this phylum                                                                                                                         |
| 39    | Mollusca        | Trochozoa     | Mollusks                  |                                      | Blue Mussel                                           | IC                                                                                  | Lateral Gill Cilia                                                                                                                                  | 1                                                                                       | 1                                                                               | Fluid pumping for filter feeding ( particles of 4µm or more)                                                                                                                                                                                         | Risgard 1996, 2015                                    | 40     |                                                   | 0.35 | Risgard 2015, Fig.4c; Risgard 1969, Fig.2                                           | 15                    | Risgard 2015, text                                                       | 15                                                 | width of ridge; Risgard 2015, text                                                | 0.5                                                                                                             |                                                                                                                                                                                      |
| 40    | Mollusca        | Trochozoa     | Mollusks                  |                                      | Bobtail squid                                         | IC                                                                                  | Proximal ciliated duct that leads to crypts in light organ                                                                                          | 1                                                                                       | 0                                                                               | Potentially interaction with symbionts                                                                                                                                                                                                               | Essock-Burns 2020                                     | 18     |                                                   | 0.55 | Essocks-Burns 2020                                                                  | 5                     | Essocks-Burns 2020                                                       | 50                                                 | Essocks-Burns 2020 Fig. 2A                                                        | 0.5                                                                                                             |                                                                                                                                                                                      |
| 41    | Mollusca        | Trochozoa     | Mollusks                  |                                      | Bobtail squid                                         | IC                                                                                  | Bottleneck of ciliated duct that leads to crypts in light organ                                                                                     | 1                                                                                       | 0                                                                               | Potentially interaction with symbionts                                                                                                                                                                                                               | Essock-Burns 2020                                     | 6      |                                                   | 0.90 | Essocks-Burns 2020                                                                  | 3                     | Essocks-Burns 2020                                                       | 10                                                 | Essock-Burns 2020 Fig. 3A/B                                                       | 0.5                                                                                                             |                                                                                                                                                                                      |
| 42    | Mollusca        | Trochozoa     | Mollusks                  |                                      | Chiton                                                | IC                                                                                  | Ciliary flame of pronephridia                                                                                                                       | 2                                                                                       | 2                                                                               | Excretion/ Ultrafiltration                                                                                                                                                                                                                           | Baemler 2011                                          | 4      | 0.65                                              | 0.81 | Baemler 2011, Fig.6D                                                                | 8                     | Baemler 2011, Fig.6D                                                     | 8                                                  | Baemler 2011, Fig.6D                                                              | 0.65                                                                                                            |                                                                                                                                                                                      |
| 43    | Mollusca        | Trochozoa     | Mollusks                  |                                      | Chiton                                                | IC                                                                                  | Renopercardial duct of metanephridia                                                                                                                | 2                                                                                       | 0                                                                               | Unknown                                                                                                                                                                                                                                              | Baemler 2012                                          | 5      | 0.61                                              | 0.78 | Baemler 2012, Fig.6C                                                                | NA                    |                                                                          | 200                                                | Baemler 2012, Fig.7G                                                              | 0.61                                                                                                            |                                                                                                                                                                                      |
| 44    | Nemertea        | Trochozoa     | Ribbon worms              |                                      | Lineus viridis, Carinoma mutabilis                    | IC                                                                                  | Terminal cells of pronephridia                                                                                                                      | 2                                                                                       | 2                                                                               | Excretion/ Ultrafiltration                                                                                                                                                                                                                           | Bartolomeaus 1985, 2014                               | 1      | 0.9                                               | 0.95 | Bartolomeaus 1985, Fig. 3D; Bartolomeaus 2014, Fig.2B                               | 15                    | Bartolomeaus 2014 text                                                   | 15                                                 | Bartolomeaus 2014 text                                                            | 0.9                                                                                                             | No evidence of carpet style ducts                                                                                                                                                    |
| 45    | Oryctophora     | Panarthropoda | Velvet worms              |                                      | Ooperipatellus decoratus, Euperipatoides rowelli      | IC                                                                                  | Oviduct                                                                                                                                             | 1                                                                                       | 0                                                                               | Probably oocyte and embryo transport                                                                                                                                                                                                                 | Brockmann 2001, Curach 1999                           | 100    |                                                   | 0.10 | estimated from Curach 1999, Fig. 1                                                  | NA                    |                                                                          | 800                                                | Brockmann 2001, text                                                              |                                                                                                                 |                                                                                                                                                                                      |



## Reference list for survey of analyzed ciliated ducts (in alphabetic order)

- Apfeld, J. and Kenyon, C. (1999) 'Regulation of lifespan by sensory perception in *Caenorhabditis elegans*', *Nature*, 402(6763), p. 804. Available at: <https://doi.org/10.1038/45544>.
- Asadzadeh, S.S. *et al.* (2019) 'Hydrodynamics of the leucon sponge pump', *Journal of The Royal Society Interface*, 16(150), p. 20180630. Available at: <https://doi.org/10.1098/rsif.2018.0630>.
- Baeumler, N., Haszprunar, G. and Ruthensteiner, B. (2011) 'Development of the excretory system in the polyplacophoran mollusc, *Lepidochitona corrugata*: the protonephridium', *Journal of Morphology*, 272(8), pp. 972–986. Available at: <https://doi.org/10.1002/jmor.10964>.
- Baeumler, N., Haszprunar, G. and Ruthensteiner, B. (2012) 'Development of the excretory system in a polyplacophoran mollusc: stages in metanephridial system development', *Frontiers in Zoology*, 9(1), p. 23. Available at: <https://doi.org/10.1186/1742-9994-9-23>.
- Bartolomaeus, T. (1985) 'Ultrastructure and Development of the Protonephridia of *Lineus viridis* (Nemertini)', *Microfauna Marina*, 2, pp. 61–83.
- Bartolomaeus, T. (1989) 'Ultrastructure and development of the nephridia in *Anaitides mucosa* (Annelida, Polychaeta)', *Zoomorphology*, 109(1), pp. 15–32. Available at: <https://doi.org/10.1007/BF00312180>.
- Bartolomaeus, T., Maslakova, S. and von Döhren, J. (2014) 'Protonephridia in the larvae of the paleonemertean species *Carinoma mutabilis* (Carinomidae, Nemertea) and *Cephalothrix* (Procephalothrix) *filiformis* (Cephalothricidae, Nemertea)', *Zoomorphology*, 133(1), pp. 43–57. Available at: <https://doi.org/10.1007/s00435-013-0206-3>.
- Biuw, L.W. and Hulting, G. (1971) 'Fine-grained secretory cells in the intestine of the lancelet, *Branchiostoma* (*Amphioxus*) *lanceolatum*, studied by light microscopy', *Zeitschrift für Zellforschung und Mikroskopische Anatomie*, 120(4), pp. 546–554. Available at: <https://doi.org/10.1007/BF00340588>.
- Bolton, P.M. and Beuchat, C.A. (1991) 'Cilia in the Urinary Bladder of Reptiles and Amphibians: A Correlate of Urate Production?', *Copeia*, 1991(3), p. 711. Available at: <https://doi.org/10.2307/1446397>.
- Bonifacio, A. *et al.* (2012) 'Nature, Source and Function of Pigments in Tardigrades: In Vivo Raman Imaging of Carotenoids in *Echiniscus blumi*', *PLOS ONE*, 7(11), p. e50162. Available at: <https://doi.org/10.1371/journal.pone.0050162>.
- Boorman, C.J. and Shimeld, S.M. (2002) 'Pitx homeobox genes in *Ciona* and amphioxus show left-right asymmetry is a conserved chordate character and define the ascidian adeno-hypophysis', *Evolution & Development*, 4(5), pp. 354–365. Available at: <https://doi.org/10.1046/j.1525-142x.2002.02021.x>.
- Brandenburg, J. and Kümmel, G. (1961) 'Die feinstruktur der solenocyten', *Journal of Ultrastructure Research*, 5(5), pp. 437–452. Available at: [https://doi.org/10.1016/S0022-5320\(61\)80018-X](https://doi.org/10.1016/S0022-5320(61)80018-X).
- Bresciani, J. and Fenchel, T. (1967) 'Studies on dicyemid mesozoa II. The fine structure of the infusoriform larva', *Ophelia*, 4(1), pp. 1–18. Available at: <https://doi.org/10.1080/00785326.1967.10409609>.

- Brockmann, C. *et al.* (2001) 'The female genital system of *Ooperipatellus decoratus* (Onychophora, Peripatopsidae): an ultrastructural study', *Journal of Morphology*, 249(2), pp. 77–88. Available at: <https://doi.org/10.1002/jmor.1041>.
- Brusca, R.C., Moore, W. and Shuster, S.M. (2016) *Invertebrates*. 3 edition. Sunderland, Massachusetts U.S.A: Sinauer Associates is an imprint of Oxford University Press.
- Buchsbaum, R. *et al.* (2013) *Animals Without Backbones: An Introduction to the Invertebrates*. University of Chicago Press.
- Buckland-Nicks, J., Lundin, K. and Wallberg, A. (2019) 'The sperm of Xenacoelomorpha revisited: implications for the evolution of early bilaterians', *Zoomorphology*, 138(1), pp. 13–27. Available at: <https://doi.org/10.1007/s00435-018-0425-8>.
- Bunke, D. (1994) 'Ultrastructure of the metanephridial system in *Aeolosoma bengalense* (Annelida)', *Zoomorphology*, 114(4), pp. 247–258. Available at: <https://doi.org/10.1007/BF00416863>.
- Burighel, P. *et al.* (2001) 'Gut Ultrastructure of the Appendicularian *Oikopleura dioica* (Tunicata)', *Invertebrate Biology*, 120(3), pp. 278–293.
- Bustamante-Marin, X.M. and Ostrowski, L.E. (2017) 'Cilia and Mucociliary Clearance', *Cold Spring Harbor Perspectives in Biology*, 9(4). Available at: <https://doi.org/10.1101/cshperspect.a028241>.
- Curach, N. and Sunnucks, P. (1999) 'Molecular anatomy of an onychophoran: compartmentalized sperm storage and heterogeneous paternity', *Molecular Ecology*, 8(9), pp. 1375–1385. Available at: <https://doi.org/10.1046/j.1365-294x.1999.00698.x>.
- Delaval, B. *et al.* (2011) 'Centrin depletion causes cyst formation and other ciliopathy-related phenotypes in zebrafish', *Cell Cycle*, 10(22), pp. 3964–3972. Available at: <https://doi.org/10.4161/cc.10.22.18150>.
- Dempsey, L.C. and Nielsen, S.L. (1976) 'Surface ultrastructure of human ependyma', *Journal of Neurosurgery*, 45(1), pp. 52–55. Available at: <https://doi.org/10.3171/jns.1976.45.1.0052>.
- Deyts, C. *et al.* (2006) 'Morphological and gene expression similarities suggest that the ascidian neural gland may be osmoregulatory and homologous to vertebrate peri-ventricular organs', *The European Journal of Neuroscience*, 24(8), pp. 2299–2308. Available at: <https://doi.org/10.1111/j.1460-9568.2006.05073.x>.
- Dunn, C.W., Leys, S.P. and Haddock, S.H.D. (2015) 'The hidden biology of sponges and ctenophores', *Trends in Ecology & Evolution*, 30(5), pp. 282–291. Available at: <https://doi.org/10.1016/j.tree.2015.03.003>.
- Essock-Burns, T. *et al.* (2020) 'Interactions of Symbiotic Partners Drive the Development of a Complex Biogeography in the Squid-Vibrio Symbiosis', *mBio*, 11(3). Available at: <https://doi.org/10.1128/mBio.00853-20>.
- Faubel, R. *et al.* (2016) 'Cilia-based flow network in the brain ventricles', *Science (New York, N.Y.)*, 353(6295), pp. 176–178. Available at: <https://doi.org/10.1126/science.aae0450>.

- Ferguson, J.C. (1996) 'Madreporite Function and Fluid Volume Relationships in Sea Urchins', *Biological Bulletin*, 191(3), pp. 431–440. Available at: <https://doi.org/10.2307/1543016>.
- Flores-Delgado, G., Lytle, C. and Quinton, P.M. (2015) 'Site of Fluid Secretion in Small Airways', *American Journal of Respiratory Cell and Molecular Biology*, 54(3), pp. 312–318. Available at: <https://doi.org/10.1165/rcmb.2015-0238RC>.
- Fontaneto, D. *et al.* (2015) *Gastrotricha and Gnathifera*. Available at: <https://doi.org/10.1515/9783110274271>.
- Forchielli, A. *et al.* (2012) 'Taphonomy of the Earliest Cambrian Linguliform Brachiopods', *Acta Palaeontologica Polonica*, 59(1), pp. 185–207. Available at: <https://doi.org/10.4202/app.2011.0182>.
- Franzén, Å. and Afzelius, B.A. (1987) 'The ciliated epidermis of *Xenoturbella bocki* (Platyhelminthes, Xenoturbellida) with some phylogenetic considerations', *Zoologica Scripta*, 16(1), pp. 9–17. Available at: <https://doi.org/10.1111/j.1463-6409.1987.tb00046.x>.
- Furuya, H. (1999) 'Fourteen New Species of Dicyemid Mesozoans from Six Japanese Cephalopods, with Comments on Host Specificity', *Species Diversity*, 4(2), pp. 257–319. Available at: <https://doi.org/10.12782/specdiv.4.257>.
- Furuya, H., Tsuneki, K. and Koshida, Y. (1997) 'Fine structure of dicyemid mesozoans, with special reference to cell junctions', p. 9.
- Gemmill, J.F. (1918) 'Ciliary Action in the Internal Cavities of the Ctenophore *Pleurobrachia pileus* Fabr', *Proceedings of the Zoological Society of London*, 88(3–4), pp. 263–265. Available at: <https://doi.org/10.1111/j.1096-3642.1918.tb02097.x>.
- Gerdol, M. *et al.* (2018) 'Genetic and molecular basis of the immune system in the brachiopod *Lingula anatina*', *Developmental & Comparative Immunology*, 82, pp. 7–30. Available at: <https://doi.org/10.1016/j.dci.2017.12.021>.
- Gruhl, A., Wegener, I. and Bartolomaeus, T. (2009) 'Ultrastructure of the body cavities in Phylactolaemata (Bryozoa)', *Journal of Morphology*, 270(3), pp. 306–318. Available at: <https://doi.org/10.1002/jmor.10691>.
- Han, J. and Sadiq, N.M. (2020) 'Anatomy, Abdomen and Pelvis, Fallopian Tube', in *StatPearls*. Treasure Island (FL): StatPearls Publishing. Available at: <http://www.ncbi.nlm.nih.gov/books/NBK547660/> (Accessed: 12 March 2020).
- Hanelt, B., Thomas, F. and Schmidt-Rhaesa, A. (2005) 'Biology of the Phylum Nematomorpha', in J.R. Baker, R. Muller, and D. Rollinson (eds) *Advances in Parasitology*. Academic Press, pp. 243–305. Available at: [https://doi.org/10.1016/S0065-308X\(05\)59004-3](https://doi.org/10.1016/S0065-308X(05)59004-3).
- Harmata, K.L. *et al.* (2013) 'Quantitative measures of gastrovascular flow in octocorals and hydroids: toward a comparative biology of transport systems in cnidarians', *Invertebrate Biology*, 132(4), pp. 291–304. Available at: <https://doi.org/10.1111/ivb.12028>.

- Hay-Schmidt, A. (1987) 'The Ultrastructure of the Protonephridium of the Actinotroch Larva (Phoronida)', *Acta Zoologica*, 68(1), pp. 35–47. Available at: <https://doi.org/10.1111/j.1463-6395.1987.tb00874.x>.
- He, C. *et al.* (2018) 'Phagocytic intracellular digestion in amphioxus (Branchiostoma)', *Proceedings of the Royal Society B: Biological Sciences*, 285(1880), p. 20180438. Available at: <https://doi.org/10.1098/rspb.2018.0438>.
- Hess, R.A. (2015) 'Small tubules, surprising discoveries: from efferent ductules in the turkey to the discovery that estrogen receptor alpha is essential for fertility in the male', *Animal reproduction*, 12(1), pp. 7–23.
- Holmberg, K. (1982) 'The Ciliated Brain Duct of *Oikopleura dioica* (Tunicata, Appendicularia)', *Acta Zoologica*, 63(2), pp. 101–109. Available at: <https://doi.org/10.1111/j.1463-6395.1982.tb00765.x>.
- Hopcroft, R.R. and Robison, B.H. (2005) 'New mesopelagic larvaceans in the genus *Fritillaria* from Monterey Bay, California', *Journal of the Marine Biological Association of the United Kingdom*, 85(3), pp. 665–678. Available at: <https://doi.org/10.1017/S0025315405011598>.
- Jiménez, A.J. *et al.* (2014) 'Structure and function of the ependymal barrier and diseases associated with ependyma disruption', *Tissue Barriers*, 2(1), p. e28426. Available at: <https://doi.org/10.4161/tisb.28426>.
- Kato, C., Lehrke, J. and Quast, B. (2011) 'Ultrastructure and phylogenetic significance of the head kidneys in *Thalassema thalassema* (Thalassematinae, Echiura)', *Zoomorphology*, 130(2), pp. 97–106. Available at: <https://doi.org/10.1007/s00435-011-0124-1>.
- Kieneke, A. *et al.* (2008) 'Ultrastructure of protonephridia in *Xenotrichula carolinensis sylvensis* and *Chaetonotus maximus* (Gastrotricha: Chaetonotida): comparative evaluation of the gastrotrich excretory organs', *Zoomorphology*, 127(1), pp. 1–20. Available at: <https://doi.org/10.1007/s00435-007-0051-3>.
- Kristensen, R.M. and Funch, P. (2000) 'Micrognathozoa: a new class with complicated jaws like those of Rotifera and Gnathostomulida', *Journal of Morphology*, 246(1), pp. 1–49. Available at: [https://doi.org/10.1002/1097-4687\(200010\)246:1<1::AID-JMOR1>3.0.CO;2-D](https://doi.org/10.1002/1097-4687(200010)246:1<1::AID-JMOR1>3.0.CO;2-D).
- Kümmel, G. (1962) 'Zwei neue Formen von Cyrtocyten. Vergleich der bisher bekannten Cyrtocyten und Erörterung des Begriffes „Zelltyp“', *Zeitschrift für Zellforschung und Mikroskopische Anatomie*, 57(2), pp. 172–201. Available at: <https://doi.org/10.1007/BF00319392>.
- Lambot, M.-A.H. *et al.* (2009) 'Three-Dimensional Reconstruction of Efferent Ducts in Wild-Type and *Lgr4* Knock-Out Mice', *The Anatomical Record: Advances in Integrative Anatomy and Evolutionary Biology*, 292(4), pp. 595–603. Available at: <https://doi.org/10.1002/ar.20883>.
- Lammert, V. (1985) 'The fine structure of protonephridia in Gnathostomulida and their comparison within Bilateria', *Zoomorphology*, 105(5), pp. 308–316. Available at: <https://doi.org/10.1007/BF00312062>.
- Lee, K.H. *et al.* (2000) 'Estrogen receptor alpha has a functional role in the mouse rete testis and efferent ductules', *Biology of Reproduction*, 63(6), pp. 1873–1880.

- Lee, M.-S. *et al.* (2015) 'IFT46 plays an essential role in cilia development', *Developmental Biology*, 400(2), pp. 248–257. Available at: <https://doi.org/10.1016/j.ydbio.2015.02.009>.
- Leys, S.P. *et al.* (2011) 'The Sponge Pump: The Role of Current Induced Flow in the Design of the Sponge Body Plan', *PLOS ONE*, 6(12), p. e27787. Available at: <https://doi.org/10.1371/journal.pone.0027787>.
- Leys, S.P. and Eerkes-Medrano, D.I. (2006) 'Feeding in a calcareous sponge: particle uptake by pseudopodia', *The Biological Bulletin*, 211(2), pp. 157–171. Available at: <https://doi.org/10.2307/4134590>.
- López-Urrutia, Á. and Acuña, J.L. (1999) 'Gut throughput dynamics in the appendicularian *Oikopleura dioica*', *Marine Ecology Progress Series*, 191, pp. 195–205.
- Ma, W. *et al.* (2022) 'Alleviation of Tris(2-chloroethyl) Phosphate Toxicity on the Marine Rotifer *Brachionus plicatilis* by Polystyrene Microplastics: Features and Molecular Evidence', *International Journal of Molecular Sciences*, 23(9), p. 4934. Available at: <https://doi.org/10.3390/ijms23094934>.
- Manni, L. *et al.* (2005) 'Stomodaeal and neurohypophysial placodes in *Ciona intestinalis*: insights into the origin of the pituitary gland', *Journal of Experimental Zoology Part B: Molecular and Developmental Evolution*, 304B(4), pp. 324–339. Available at: <https://doi.org/10.1002/jez.b.21039>.
- Matsubara, J.A. and Dudley, P.L. (1976) 'Fine Structural Studies of the Dicyemid Mesozoan, *Dicyemmenea californica* McConnaughey. II. The Young Vermiform Stage and the Infusoriform Larva', *The Journal of Parasitology*, 62(3), p. 390. Available at: <https://doi.org/10.2307/3279147>.
- Mayer, G. (2006) 'Origin and differentiation of nephridia in the Onychophora provide no support for the Articulata', *Zoomorphology*, 125(1), pp. 1–12. Available at: <https://doi.org/10.1007/s00435-005-0006-5>.
- Mayer, G. and Whittington, P.M. (2009) 'Neural development in Onychophora (velvet worms) suggests a step-wise evolution of segmentation in the nervous system of Panarthropoda', *Developmental Biology*, 335(1), pp. 263–275. Available at: <https://doi.org/10.1016/j.ydbio.2009.08.011>.
- McKanna, J.A. (1968) 'Fine structure of the protonephridial system in planaria. II. Ductules, Collecting Ducts, and Osmoregulatory Cells', *Zeitschrift für Zellforschung*, 92, pp. 524–535.
- Meyrick, B., Sturgess, J.M. and Reid, L. (1969) 'A reconstruction of the duct system and secretory tubules of the human bronchial submucosal gland', *Thorax*, 24(6), pp. 729–736. Available at: <https://doi.org/10.1136/thx.24.6.729>.
- Møbjerg, N., Jespersen, Å. and Wilkinson, M. (2004) 'Morphology of the kidney in the West African caecilian, *Geotrypetes seraphini* (Amphibia, Gymnophiona, Caeciliidae): Kidney Morphology in *G. seraphini*', *Journal of Morphology*, 262(2), pp. 583–607. Available at: <https://doi.org/10.1002/jmor.10244>.
- Møbjerg, N., Larsen, E.H. and Jespersen, Å. (1998) 'Morphology of the Nephron in the Mesonephros of *Bufo bufo* (Amphibia, Anura, Bufonidae)', *Acta Zoologica*, 79(1), pp. 31–50. Available at: <https://doi.org/10.1111/j.1463-6395.1998.tb01140.x>.

Møbjerg, N., Larsen, E.H. and Jespersen, A. (2000) 'Morphology of the kidney in larvae of *Bufo viridis* (Amphibia, Anura, Bufonidae)', *Journal of Morphology*, 245(3), pp. 177–195. Available at: [https://doi.org/10.1002/1097-4687\(200009\)245:3<177::AID-JMOR1>3.0.CO;2-F](https://doi.org/10.1002/1097-4687(200009)245:3<177::AID-JMOR1>3.0.CO;2-F).

Moller, P.C. and Ellis, R.A. (1974) 'Fine structure of the excretory system of *Amphioxus* (Branchiostoma floridae) and its response to osmotic stress', *Cell and Tissue Research*, 148(1), pp. 1–9. Available at: <https://doi.org/10.1007/BF00224314>.

Morris, JudithL. (1981) 'Structure and function of ciliated peritoneal funnels in the toad kidney (*Bufo marinus*)', *Cell and Tissue Research*, 217(3), pp. 599–610. Available at: <https://doi.org/10.1007/BF00219367>.

Neuhaus, B. (1988) 'Ultrastructure of the protonephridia in *Pycnophyes kielensis* (Kinorhyncha, Homalorhagida)', *Zoomorphology*, 108(4), pp. 245–253. Available at: <https://doi.org/10.1007/BF00312224>.

Neuhaus, B. and Kristensen, R.M. (2007) 'Ultrastructure of the protonephridia of larval *Rugiloricus* cf. *cauliculus*, male *Armorloricus elegans*, and female *Nanaloricus mysticus* (Loricifera)', *Journal of Morphology*, 268(4), pp. 357–370. Available at: <https://doi.org/10.1002/jmor.10521>.

Neves, R.C. *et al.* (2010) 'Comparative myoanatomy of cyclophoran life cycle stages', *Journal of Morphology*, 271(5), pp. 596–611. Available at: <https://doi.org/10.1002/jmor.10819>.

Norekian, T.P. and Moroz, L.L. (2019) 'Neural system and receptor diversity in the ctenophore *Beroë abyssicola*', *The Journal of Comparative Neurology*, 527(12), pp. 1986–2008. Available at: <https://doi.org/10.1002/cne.24633>.

Ott, E. *et al.* (2016) 'Pronephric tubule morphogenesis in zebrafish depends on Mnx mediated repression of *irx1b* within the intermediate mesoderm', *Developmental Biology*, 411(1), pp. 101–114. Available at: <https://doi.org/10.1016/j.ydbio.2015.10.014>.

Perez, Y., Casanova, J.-P. and Mazza, J. (2000) 'Changes in the structure and ultrastructure of the intestine of *Spadella* cephaloptera (Chaetognatha) during feeding and starvation experiments', *Journal of Experimental Marine Biology and Ecology*, 253(1), pp. 1–15. Available at: [https://doi.org/10.1016/S0022-0981\(00\)00228-8](https://doi.org/10.1016/S0022-0981(00)00228-8).

Perez, Y., Casanova, J.-P. and Mazza, J. (2001) 'Degrees of vacuolation of the absorptive intestinal cells of five *Sagitta* (Chaetognatha) species: possible ecophysiological implications', *Marine Biology*, 138(1), pp. 125–133. Available at: <https://doi.org/10.1007/s002270000438>.

Presnell, J.S. *et al.* (2016) 'The Presence of a Functionally Tripartite Through-Gut in Ctenophora Has Implications for Metazoan Character Trait Evolution', *Current Biology*, 26(20), pp. 2814–2820. Available at: <https://doi.org/10.1016/j.cub.2016.08.019>.

Purschke, G. and Tzetlin, A.B. (1996) 'Dorsolateral Ciliary Folds in the Polychaete Foregut: Structure, Prevalence and Phylogenetic Significance', *Acta Zoologica*, 77(1), pp. 33–49. Available at: <https://doi.org/10.1111/j.1463-6395.1996.tb01251.x>.



Raidt, J. *et al.* (2015) 'Ciliary function and motor protein composition of human fallopian tubes', *Human Reproduction (Oxford, England)*, 30(12), pp. 2871–2880. Available at: <https://doi.org/10.1093/humrep/dev227>.

Reiten, I. *et al.* (2017) 'Motile-Cilia-Mediated Flow Improves Sensitivity and Temporal Resolution of Olfactory Computations', *Current Biology*, 27(2), pp. 166–174. Available at: <https://doi.org/10.1016/j.cub.2016.11.036>.

Rheubert, J.L., Siegel, D.S. and Trauth, S.E. (2014) *Reproductive Biology and Phylogeny of Lizards and Tuatara*. CRC Press.

Riisgård, H.U., Funch, P. and Larsen, P.S. (2015) 'The mussel filter-pump – present understanding, with a re-examination of gill preparations', *Acta Zoologica*, 96(3), pp. 273–282. Available at: <https://doi.org/10.1111/azo.12110>.

Riisgård, H.U., Larsen, P.S. and Nielsen, N.F. (1996) 'Particle capture in the mussel *Mytilus edulis*: The role of latero-frontal cirri', *Marine Biology*, 127(2), pp. 259–266. Available at: <https://doi.org/10.1007/BF00942111>.

Rink, J.C., Vu, H.T.-K. and Sánchez Alvarado, A. (2011) 'The maintenance and regeneration of the planarian excretory system are regulated by EGFR signaling', *Development (Cambridge, England)*, 138(17), pp. 3769–3780. Available at: <https://doi.org/10.1242/dev.066852>.

Rohde, K. and Watson, N.A. (1992) 'Ultrastructure of the Flame Bulbs and Protonephridial Capillaries of *Artioposthia* sp. (Platyhelminthes, Tricladida, Geoplanidae)', *Acta Zoologica*, 73(4), pp. 231–236. Available at: <https://doi.org/10.1111/j.1463-6395.1992.tb01087.x>.

Ruppert, E.E. (1990) 'Structure, Ultrastructure and Function of the Neural Gland Complex of *Ascidia interrupta* (Chordata, Ascidiacea): Clarification of Hypotheses Regarding the Evolution of the Vertebrate Anterior Pituitary', *Acta Zoologica*, 71(3), pp. 135–149. Available at: <https://doi.org/10.1111/j.1463-6395.1990.tb01189.x>.

Ruppert, E.E. (1996) 'Morphology of Hatschek's nephridium in larval and juvenile stages of *Branchiostoma virginiae* (Cephalochordata)', 42, pp. 161–182.

Schramm, U. (1978) 'On the excretory system of the rotifer *Habrotrocha rosa donner*', *Cell and Tissue Research*, 189(3). Available at: <https://doi.org/10.1007/BF00209137>.

Schwaha, T., Wood, T.S. and Wanninger, A. (2010) 'Trapped in freshwater: the internal anatomy of the entoproct *Loxosomatoides sirindhornae*', *Frontiers in Zoology*, 7, p. 7. Available at: <https://doi.org/10.1186/1742-9994-7-7>.

Sharaf, A., Eid, W. and Abuel-Atta, A.A. (2013) 'Age-related morphology of the ostrich oviduct (isthmus, uterus and vagina)', *Bulgarian Journal of Veterinary Medicine*, 16(3), p. 15.

Sherlock, R.E. *et al.* (2016) 'Morphology, ecology, and molecular biology of a new species of giant larvacean in the eastern North Pacific: *Bathochordaeus mcnutti* sp. nov.', *Marine Biology*, 164(1), p. 20. Available at: <https://doi.org/10.1007/s00227-016-3046-0>.

- Sherlock, R.E., Walz, K.R. and Robison, B.H. (2016) 'The first definitive record of the giant larvacean, *Bathochordaeus charon*, since its original description in 1900 and a range extension to the northeast Pacific Ocean', *Marine Biodiversity Records*, 9(1), p. 79. Available at: <https://doi.org/10.1186/s41200-016-0075-9>.
- Smith, C.L., Pivovarov, N. and Reese, T.S. (2015) 'Coordinated Feeding Behavior in *Trichoplax*, an Animal without Synapses', *PLoS ONE*, 10(9). Available at: <https://doi.org/10.1371/journal.pone.0136098>.
- Storch, V., Higgins, R.P. and Morse, M.P. (1989) 'Internal Anatomy of *Meiopriapululus fijiensis* (Priapulida)', *Transactions of the American Microscopical Society*, 108(3), pp. 245–261. Available at: <https://doi.org/10.2307/3226343>.
- Storch, V.V., Ruhberg, H. and Alberti, G. (1978) 'Zur Ultrastruktur der Segmentalorgane der Peripatopsidae (Onychophora)', *Zool. Jb. Anat. Bd.*, 100, pp. 47–63.
- Suzuki, A.C. and Kristensen, R.M. (2014) 'Spermatozoa in the reproductive system of a hermaphroditic marine tardigrade, *Orzeliscus belopus* (Tardigrada: Arthrotardigrada)', *Zoologischer Anzeiger - A Journal of Comparative Zoology*, 253(6), pp. 497–511. Available at: <https://doi.org/10.1016/j.jcz.2014.07.003>.
- Tamm, S.L. (2014) 'Cilia and the life of ctenophores', *Invertebrate Biology*, 133(1), pp. 1–46. Available at: <https://doi.org/10.1111/ivb.12042>.
- Tamori, M., Matsuno, A. and Takahashi, K. (1996) 'Structure and Function of the Pore Canals of the Sea Urchin Madreporite', *Philosophical Transactions: Biological Sciences*, 351(1340), pp. 659–676.
- Temereva, E.N. (2010) 'The digestive tract of actinotroch larvae (Lophotrochozoa, Phoronida): anatomy, ultrastructure, innervations, and some observations of metamorphosis', *Canadian Journal of Zoology*, 88(12), pp. 1149–1168. Available at: <https://doi.org/10.1139/Z10-075>.
- Valverde-Islas, L.E. *et al.* (2011) 'Visualization and 3D Reconstruction of Flame Cells of *Taenia solium* (Cestoda)', *PLoS ONE*, 6(3). Available at: <https://doi.org/10.1371/journal.pone.0014754>.
- Vasilyev, A. *et al.* (2012) 'Mechanical Stretch and PI3K Signaling Link Cell Migration and Proliferation to Coordinate Epithelial Tubule Morphogenesis in the Zebrafish Pronephros', *PLoS ONE*. Edited by F. Pichaud, 7(7), p. e39992. Available at: <https://doi.org/10.1371/journal.pone.0039992>.
- Warner, F.D. (1969) 'The Fine Structure of the Protonephridio in the Rotifer *Asplanchna*', *J Ultrastructure Research*, 29, pp. 499–524.
- Weibel, E.R. (1963) *Morphometry of the Human Lung*. Berlin Heidelberg: Springer-Verlag. Available at: <https://doi.org/10.1007/978-3-642-87553-3>.
- Westbroek, P. (1968) 'Morphological observations with systematic implications on some palaeozoic Rhynchonellida from Europe, with special emphasis on the Uncinulidae', *Leidse Geologische Mededelingen*, 41(1), pp. 1–82.
- Westbroek, P., Yanagida, J. and Isa, Y. (1980) 'Functional Morphology of Brachiopod and Coral Skeletal Structures Supporting Ciliated Epithelia', *Paleobiology*, 6(3), pp. 313–330.

Worsaae, K. *et al.* (2012) 'An Anatomical Description of a Miniaturized Acorn Worm (Hemichordata, Enteropneusta) with Asexual Reproduction by Paratomy', *PLoS ONE*. Edited by A. Hejnol, 7(11), p. e48529. Available at: <https://doi.org/10.1371/journal.pone.0048529>.

Worthington, W.C. and Cathcart, R.S. (1963) 'Ependymal cilia: distribution and activity in the adult human brain', *Science (New York, N.Y.)*, 139(3551), pp. 221–222. Available at: <https://doi.org/10.1126/science.139.3551.221>.

Xiong, G. *et al.* (2014) 'Traumatic Brain Injury-Induced Ependymal Ciliary Loss Decreases Cerebral Spinal Fluid Flow', *Journal of Neurotrauma*, 31(16), pp. 1396–1404. Available at: <https://doi.org/10.1089/neu.2013.3110>.

Yu, J.-P. and Cui, S.-J. (1997) 'Ultrastructure of the rotifer *Brachionus plicatilis*', in A. Hagiwara *et al.* (eds) *Live Food in Aquaculture*. Dordrecht: Springer Netherlands (Developments in Hydrobiology), pp. 95–103. Available at: [https://doi.org/10.1007/978-94-017-2097-7\\_15](https://doi.org/10.1007/978-94-017-2097-7_15).

Yuan, S. *et al.* (2019) 'Motile cilia of the male reproductive system require miR-34/miR-449 for development and function to generate luminal turbulence', *Proceedings of the National Academy of Sciences*, 116(9), pp. 3584–3593. Available at: <https://doi.org/10.1073/pnas.1817018116>.

Zhang, Q. *et al.* (2012) 'Knockdown of *ttc26* disrupts ciliogenesis of the photoreceptor cells and the pronephros in zebrafish', *Molecular Biology of the Cell*. Edited by E. Holzbaur, 23(16), pp. 3069–3078. Available at: <https://doi.org/10.1091/mbc.e12-01-0019>.

Zhuravlova, I., Kornieieva, M. and Rodrigues, E. (2018) 'Anatomic Variability of the Morphometric Parameters of the Fourth Ventricle of the Brain', *Journal of Neurological Surgery. Part B, Skull Base*, 79(2), pp. 200–204. Available at: <https://doi.org/10.1055/s-0037-1606331>.

Zverkov, O.A. *et al.* (2019) 'Dicyemida and Orthonectida: Two Stories of Body Plan Simplification', *Frontiers in Genetics*, 10. Available at: <https://doi.org/10.3389/fgene.2019.00443>.
